# Supplementary material
Source: publisher figshare collection journal article supplement (https://acs.figshare.com/ndownloader/files/4102315)
Supplement: Supplementary file 1 [file 4102315]

# Impact of Sunlight and Humic Acid on the Deposition Kinetics of Aqueous Fullerene Nanoparticles (nC<sub>60</sub>)

*Xiaolei Qu, Pedro J.J. Alvarez, and Qilin Li\**

Department of Civil and Environmental Engineering, Rice University, Houston TX 77005

\* Corresponding author: Qilin Li phone: (713)348-2046; fax: (713)348-5268; email: [qilin.li@rice.edu](mailto:qilin.li@rice.edu)

Environmental Science & Technology

This SI includes a total of 11 pages (including this page) with 4 tables and 6 figures.

## QCM-D characterization of particle deposition kinetics

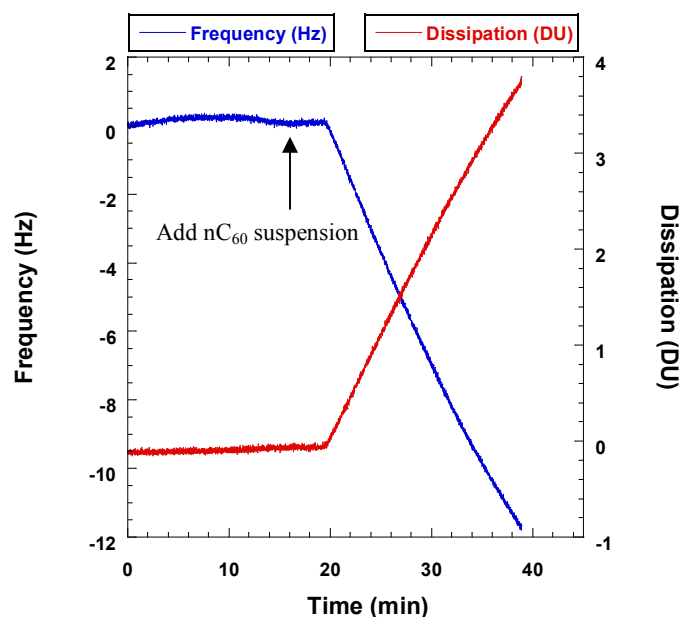

Figure S1. Representative QCM-D measurement data. The figure shows the frequency and dissipation measured at the 3<sup>rd</sup> overtone as a function of time during the deposition experiment of pristine nC<sub>60</sub> onto bare silica surface in 20 mM NaCl solution.

Table S1. The initial slope of the measured 3<sup>rd</sup> overtone frequency shift  $\Delta f_3$  and the mass deposition rate calculated by the viscoelastic Voigt model for pristine nC<sub>60</sub> deposition on silica surface at various NaCl concentrations.

| NaCl (mM) | $\Delta f_3$ (Hz/min) | Mass Deposition Rate (ng/cm <sup>2</sup> min) |
|-----------|-----------------------|-----------------------------------------------|
| 5         | 0.0615                | 1.5                                           |
| 10        | 0.5955                | 16.7                                          |
| 20        | 0.6525                | 19.8                                          |
| 40        | 0.2385                | 12                                            |
| 80        | 0.147                 | 7.2                                           |
| 100       | 0.099                 | 4.9                                           |

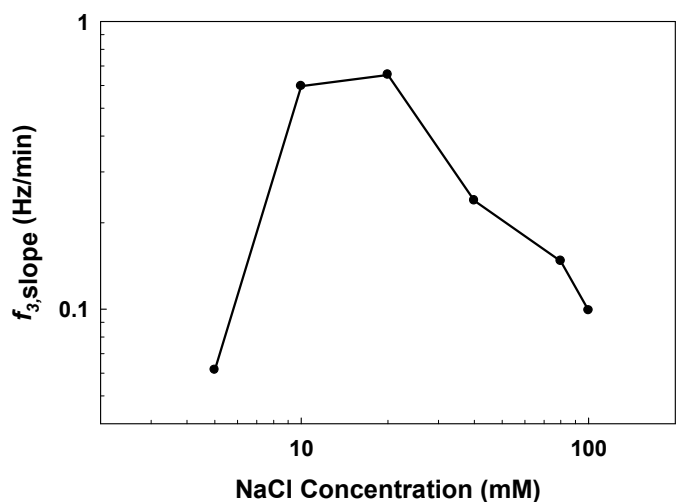

Figure S2a. The initial slop of the measured 3<sup>rd</sup> overtone frequency shift  $f_{3,slope}$  of pristine nC<sub>60</sub> deposition on silica surface as a function of NaCl concentration.

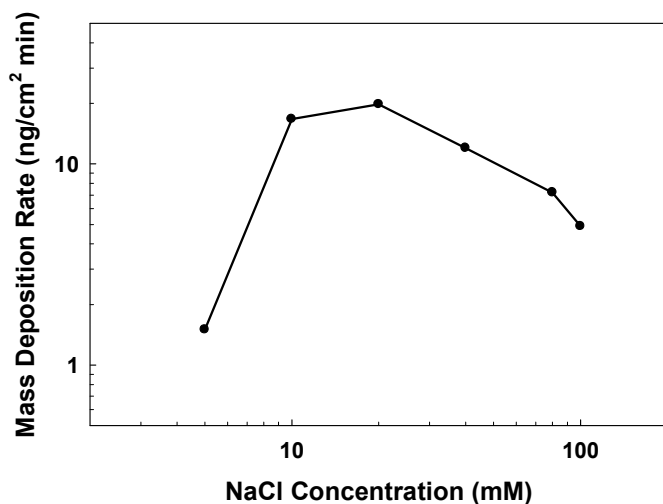

Figure S2b. The mass deposition rate calculated by the viscoelastic Voigt model for pristine nC<sub>60</sub> deposition on silica surface as a function of NaCl concentration.

### Determination of nC<sub>60</sub> particle size in deposition experiments

In the QCM-D experiments, it took 5 min for the nC<sub>60</sub> nanoparticles to reach the measurement chamber after being mixed with the NaCl solution. At high ionic strength nC<sub>60</sub> aggregation occurred. The nC<sub>60</sub> particle size during deposition in the measurement chamber was therefore determined based on the aggregation kinetics curve (average particle size vs. aggregation time) by setting the aggregation time to

39 be 5 min.

40 Table S2. Pristine and 7-day UVA-irradiated (7DUV) nC<sub>60</sub> particle size during the QCM-D experiments.

| Sample                   | NaCl concentration (mM) | Particle/aggregate size at 5 min (nm) |
|--------------------------|-------------------------|---------------------------------------|
| Prstine nC <sub>60</sub> | 1                       | 162                                   |
|                          | 5                       | 162                                   |
|                          | 10                      | 162                                   |
|                          | 20                      | 163.8                                 |
|                          | 40                      | 241.8                                 |
|                          | 60                      | 334.5                                 |
|                          | 80                      | 449.4                                 |
|                          | 100                     | 492                                   |
| 7DUV nC <sub>60</sub>    | 40                      | 162                                   |
|                          | 100                     | 162                                   |
|                          | 150                     | 162                                   |
|                          | 200                     | 168.9                                 |
|                          | 250                     | 191.1                                 |
|                          | 300                     | 244.5                                 |
|                          | 350                     | 280.8                                 |

41

## 42 **Packed column experiments**

43 Quartz sand sizing from 250  $\mu\text{m}$  to 300  $\mu\text{m}$  in diameter was obtained by sieving a 50 - 70 mesh quartz  
44 sand (sigma-aldrich) with 50 and 60 mesh sieves. Before use, the sand was cleaned by soaking in a 1.5  
45 M HNO<sub>3</sub> solution for 24 h and rinsing with deionized water until the pH reaches neutral. The sand was  
46 then oven dried at 100 °C for 24 h. Columns (Omnifit, 1.5 cm in diameter) were wet packed with clean  
47 quartz sand to a height of ~5 cm with a porosity of 0.39 as determined gravimetrically. Figure S3  
48 presents the packed column experimental setup. Ten pore volume of deionized water, followed by 10  
49 pore volume of background solution, was passed through the column at a flow rate of 2 mL/min to rinse  
50 and condition the sand. The nC<sub>60</sub> stock suspension and the electrolyte stock solution were mixed to yield  
51 the test nC<sub>60</sub> suspension at 5 mg/L, which was then introduced into the column at a flow rate of 0.84  
52 mL/min until the effluent nC<sub>60</sub> concentration reached steady state. The effluent was continuously  
53 collected by a fraction collector (Pharmacia Fine Chemicals) and the nC<sub>60</sub> concentration was analyzed  
54 using a UV-vis spectrophotometer (UV 2550, Shimadazu) at a wavelength of 350 nm. Representative  
55 breakthrough curves of nC<sub>60</sub> are shown in Figure S4.

56 To create favorable deposition conditions, clean quartz sand was precoated with poly-L-lysine (PLL) by

57 soaking in a solution containing 20 mg/L PLL, 100 mM NaCl and 10 mM HEPES, followed by  
58 thoroughly rinsing with deionized water and drying at room temperature.

59 The deposition rate coefficient  $K_d$  of nC<sub>60</sub> in different solution chemistry was determined using  
60 following equation: <sup>2</sup>

61 
$$k_d = -\frac{U}{\varepsilon L} \ln\left(\frac{C}{C_0}\right)$$

62 where  $U$  is the superficial velocity,  $\varepsilon$  is the porosity,  $L$  is the column length,  $C$  is the steady state effluent  
63 concentration of nC<sub>60</sub> (i.e., the plateau of the breakthrough curve), and  $C_0$  is the influent nC<sub>60</sub>  
64 concentration.

65 The particle attachment efficiency  $\alpha$  was calculated by normalizing the deposition rate coefficient of  
66 interest,  $K_d$ , by the deposition rate coefficient under favorable conditions,  $K_{d,fav}$ .

67

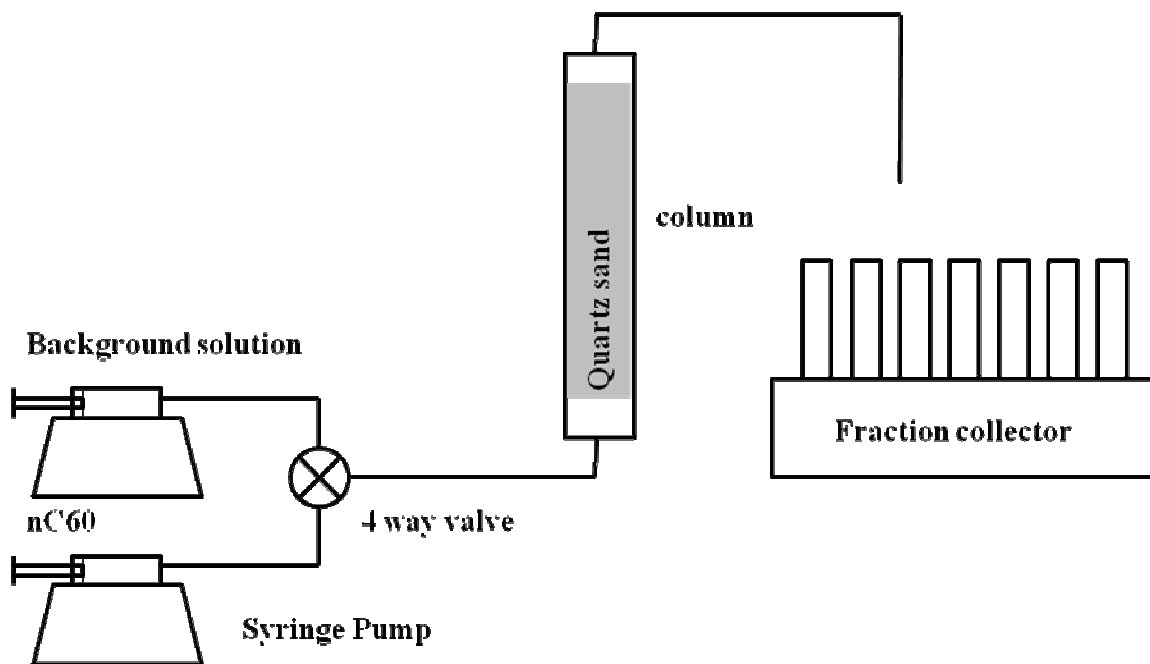

68  
69 Figure S3. Diagram of the packed column setup

70

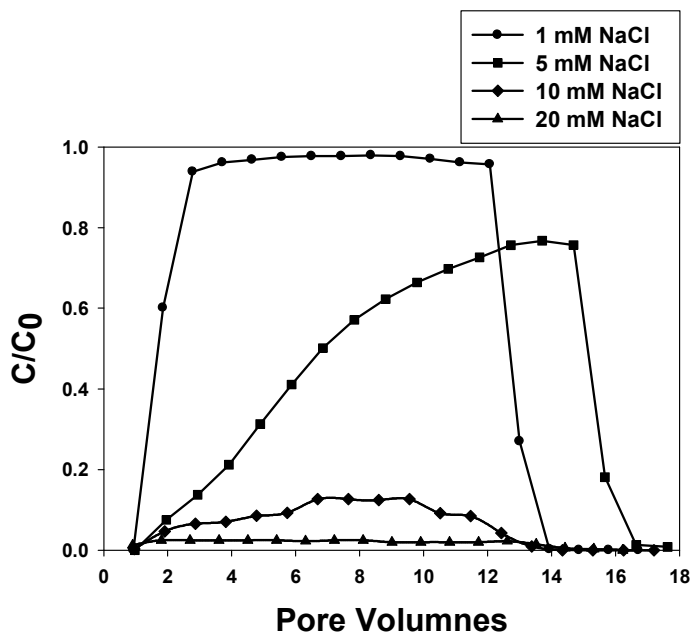

Figure S4. Representative breakthrough curves for nC<sub>60</sub> (5 mg/L) transport experiments in silica sand packed columns in NaCl solutions.

The seepage velocity used in the packed column experiments was controlled to match the flow velocity used in the QCM-D experiment. This resulted in similar Peclet number in the two systems.

For the QCM-D system, a parallel-plate channel configuration was assumed:<sup>3</sup>

$$P_{e\text{ QCM}} = \frac{3v_m a^3}{2b^2 D}$$

Here,  $v_m$  is the flow velocity in the measurement chamber,  $a$  is the particle radius,  $b$  is the half depth of the channel (0.00032 m), and  $D$  is the diffusion coefficient. The flow velocity  $v_m$  in the QCM-D chamber is 0.0002 m/s at the volumetric flow rate of 100  $\mu\text{L}/\text{min}$ . The particle diameter  $2a$  at different ionic strength was determined in Table S1. The diffusion coefficient  $D$  is estimated using the *Stokes-Einstein* equation:

$$D = \frac{kT}{3\pi\mu d}$$

where  $k$  is the Boltzman constant ( $1.38 \times 10^{-23} \text{ J} \cdot \text{K}^{-1}$ ),  $T$  is the absolute temperature (298 K),  $\mu$  is the viscosity of water ( $10^{-3} \text{ Pa} \cdot \text{s}$ ), and the  $d$  is the particle diameter.

For packed column system, a sphere in uniform flow configuration was assumed:<sup>3</sup>

$$P_{\text{column}} = \frac{3A_f v a^3}{R^2 D}$$

Here,  $v$  is the seepage velocity in the column (0.0002 m/s),  $a$  is the radius of  $\text{nC}_{60}$  nanoparticles,  $R$  is the radius of silica sands (137.5  $\mu\text{m}$ ), and the dimensionless flow parameter  $A_f$  is given by:<sup>4</sup>

$$A_f = \frac{3}{2} \left[ 1 + \frac{0.19 R_e}{1 + 0.25 R_e^{0.56}} \right]$$

Where  $R_e$  is the Reynolds number,  $R_e = 2vR\rho/\mu$ .  $\rho$  and  $\mu$  is the density and viscosity of water respectively.

93

94 **XPS spectra of pristine and 7DUV  $\text{nC}_{60}$**

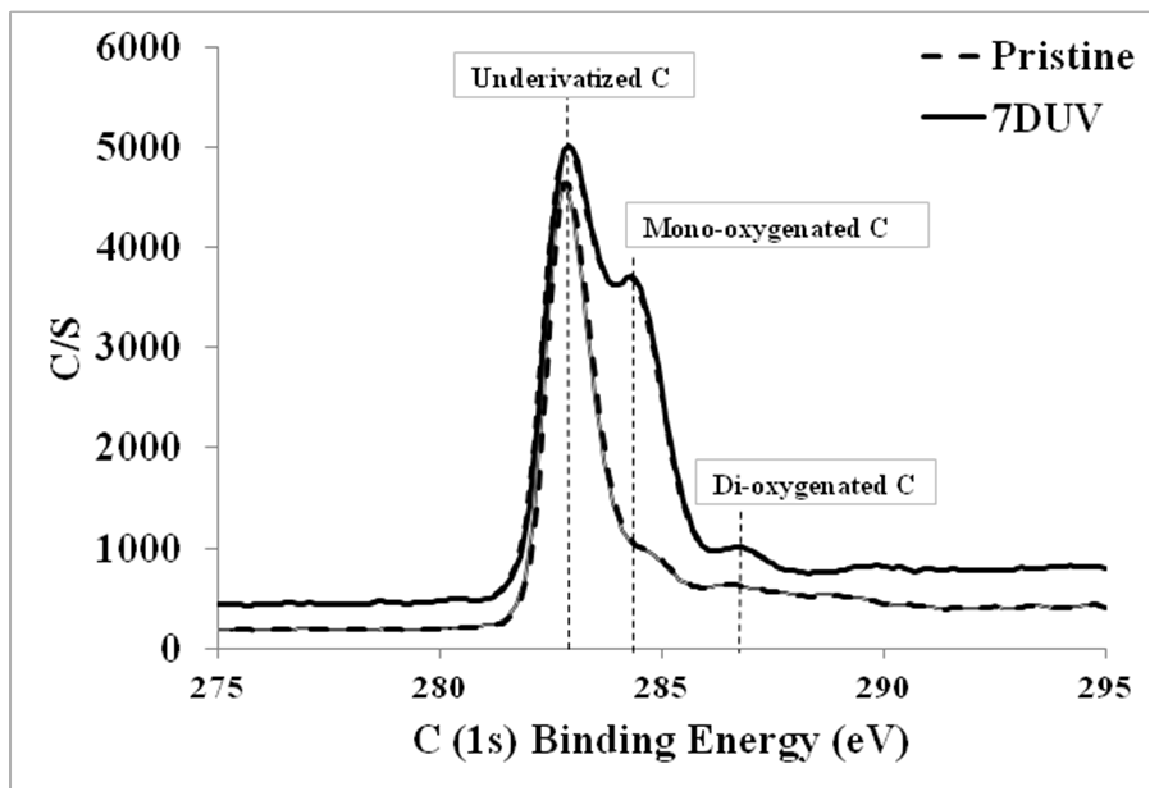

95

96 Figure S5. C(1s) XPS spectra of pristine and 7-day UVA-irradiated (7DUV)  $\text{nC}_{60}$ .

97

98 **Calculation of DLVO interaction energy between  $\text{nC}_{60}$  and bare/EHA coated silica surface**

99 The DLVO interaction energy was calculated by assuming sphere-plate interactions. The van der Waals

100 interaction energy was calculated from <sup>24</sup>:

101 
$$\Phi_v = -\frac{Aa}{6h} \left[ 1 + \frac{14h}{\lambda} \right]^{-1}$$

102 where  $A$  is the Hamaker constant of C<sub>60</sub>-water-silica system ( $4.71 \times 10^{-21}$  J<sup>7</sup>),  $a$  is the nanoparticle  
103 radius,  $h$  is the separation distance, and  $\lambda$  is the characteristic wavelength of the dielectric (normally  
104 assumed to be 100 nm).

105 The electrostatic interaction energy was calculated from <sup>25</sup>:

106 
$$\Phi_E = \pi \varepsilon_0 \varepsilon_r a \left\{ 2\psi_p \psi_c \ln \left[ \frac{1 + \exp(-\kappa h)}{1 - \exp(-\kappa h)} \right] + (\psi_p^2 + \psi_c^2) \ln[1 - \exp(-2\kappa h)] \right\}$$

107 where  $\varepsilon_0$  is the dielectric permittivity in a vacuum,  $\varepsilon_r$  is the relative dielectric permittivity of water,  $a$  is  
108 the nanoparticle radius,  $\kappa$  is the inverse Debye length,  $h$  is the separation distance, and  $\psi_p$  and  $\psi_c$  are the  
109  $\zeta$  potential of the particle and the silica surface respectively.

110

111 Table S3. Calculated energy barrier between nC<sub>60</sub> and bare/EHA coated silica surface at various NaCl  
112 concentrations. The  $\zeta$  potentials used in the calculation are presented in Figure 3b and 6a.

| NaCl (mM) | Pristine nC <sub>60</sub> -silica energy barrier (kT) | 7DUV nC <sub>60</sub> -silica energy barrier (kT) | Pristine nC <sub>60</sub> -EHA coated silica energy barrier (kT) | 7DUV nC <sub>60</sub> -EHA coated silica energy barrier (kT) |
|-----------|-------------------------------------------------------|---------------------------------------------------|------------------------------------------------------------------|--------------------------------------------------------------|
| 5         | 159.8                                                 | -                                                 | 30.5                                                             | -                                                            |
| 10        | 124.4                                                 | -                                                 | 18.5                                                             | -                                                            |
| 20        | 93.4                                                  | -                                                 | 13.4                                                             | -                                                            |
| 40        | 80.7                                                  | 139.3                                             | 0                                                                | 0.4                                                          |
| 100       | 42.3                                                  | 41.4                                              | 0                                                                | 0                                                            |
| 150       | -                                                     | 12                                                | -                                                                | 0                                                            |
| 250       | -                                                     | 0                                                 | -                                                                | 0                                                            |
| 300       | -                                                     | 0                                                 | -                                                                | 0                                                            |
| 350       | -                                                     | 0                                                 | -                                                                | 0                                                            |

113



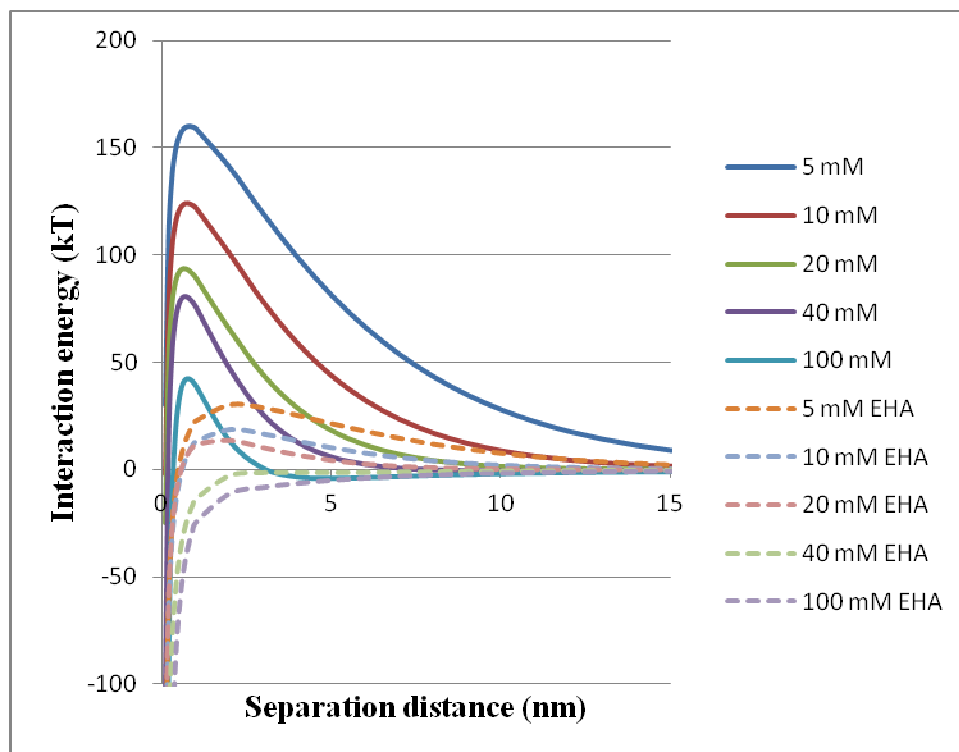

Figure S6a. Calculated DLVO interaction energy profiles for pristine  $nC_{60}$  approaching a flat silica or EHA coated silica surface at various NaCl concentrations.

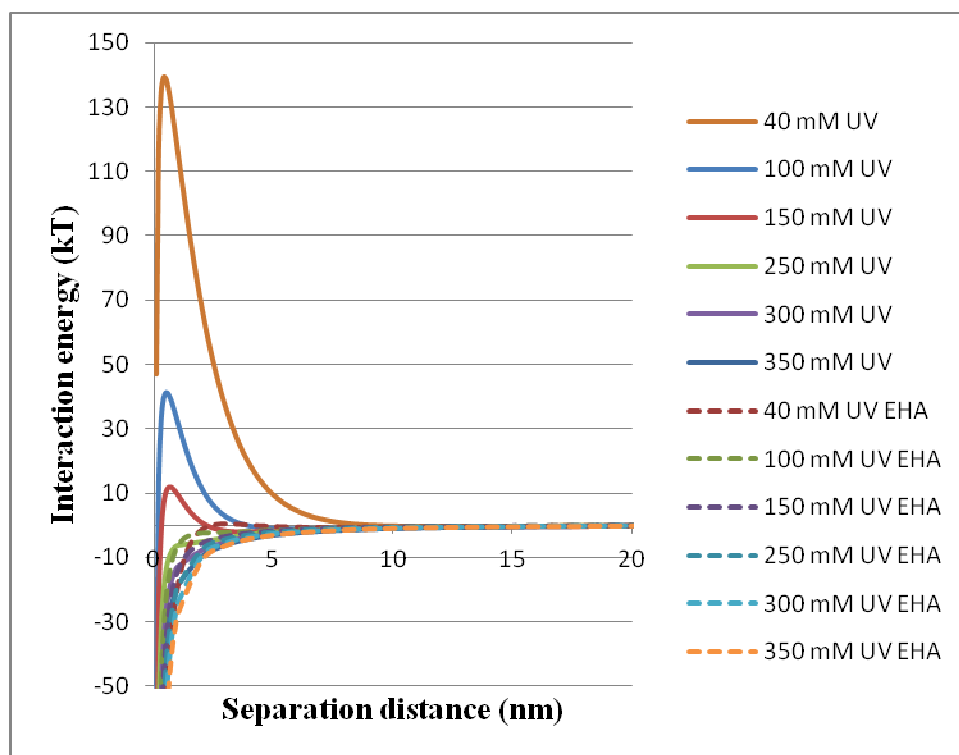

Figure S6b. Calculated DLVO interaction energy profiles for 7-day UVA-irradiated  $nC_{60}$  approaching a flat silica or EHA coated silica surface at various NaCl concentrations.

123

124 **Humic acid adsorption experiments**

125 Humic acid (HA) adsorption by the pristine and 7DUV nC<sub>60</sub> in deionized water was measured by batch  
 126 sorption experiments. The EHA stock solution was filtered through centrifugal filters equipped with 30  
 127 kDa MWCO ultrafiltration membranes (Millipor, Carrigtwohill, Co. Cork, Ireland). The resulting EHA  
 128 solution was used in the adsorption experiment. Both pristine and 7DUV nC<sub>60</sub> solutions were  
 129 concentrated using centrifugal filters to 250 mg/L. 1 mg/L EHA was mixed with 200 mg/L nC<sub>60</sub> in 10  
 130 mL PTFE-lined screw cap glass vials and agitated on a shaker bed at room temperature for 24 h. Then  
 131 the samples were filtered with the 30 kDa MWCO centrifugal filters to separate nC<sub>60</sub> and the residual  
 132 dissolved EHA. The dissolved humic acid concentration was determined by measuring UV absorbance  
 133 at 254 nm.

134 Table S4. Humic acid adsorption on pristine nC<sub>60</sub> and 7-day UV-irradiated nC<sub>60</sub> (7DUV nC<sub>60</sub>) in 1 mg/L  
 135 humic acid solutions. \*SRHA adsorption data was reported by our previous paper.<sup>1</sup>

|                           | SRHA*                | EHA                  |
|---------------------------|----------------------|----------------------|
|                           | $K_d$ (mg/Kg)/(mg/L) | $K_d$ (mg/Kg)/(mg/L) |
| Pristine nC <sub>60</sub> | 1722                 | 1648                 |
| 7DUV nC <sub>60</sub>     | Non-detectable       | Non-detectable       |

136

137 Adsorption of SRHA onto pristine nC<sub>60</sub> nanoparticles in 10 mM and 40 mM NaCl solutions was studied  
 138 by QCM-D. After coating the silica crystal surface with PLL, 5 mg/L nC<sub>60</sub> in 1 mM NaCl was flowed  
 139 across the crystal for 1 h to allow nC<sub>60</sub> deposition. The nC<sub>60</sub> deposit layer was then rinsed with the  
 140 background NaCl solutions. After a stable baseline was achieved, a 5 mg/L SRHA solution in 10 mM or  
 141 40 mM NaCl was introduced into the measurement chamber, allowing SRHA to adsorb on nC<sub>60</sub> until  
 142 reaching adsorption equilibrium. The amount of SRHA adsorbed was calculated using the Sauerbrey  
 143 Equation. The SRHA adsorption density on nC<sub>60</sub> was quantified by normalizing the total amount of  
 144 SRHA adsorbed with the surface area of the crystal.

145

146 **Literature Cited**

147 (1) Qu, X. L.; Hwang, Y. S.; Alvarez, P. J. J.; Bouchard, D.; Li, Q. L., UV Irradiation and Humic  
 148 Acid Mediate Aggregation of Aqueous Fullerene (nC(60)) Nanoparticles. *Environ. Sci. Technol.* **2010**,  
 149 44, (20), 7821-7826.

- 150 (2) Kretzschmar, R.; Borkovec, M.; Grolimund, D.; Elimelech, M., Mobile subsurface colloids and  
151 their role in contaminant transport. *Advances in Agronomy, Vol 66* **1999**, 66, 121-193.
- 152 (3) Gregory, J.; Jia, X.; Williams, R., *Particle deposition and aggregation: measurement, modelling*  
153 *and simulation*. Butterworth-Heinemann: 1998.
- 154 (4) Adamczyk, Z.; Warszynski, P.; Szyk-Warszynska, L.; Weronki, P., Role of convection in  
155 particle deposition at solid surfaces. *Colloid Surf. A-Physicochem. Eng. Asp.* **2000**, 165, (1-3), 157-187.

156

157
